# Supplementary material for: Efficient and Divergent Enantioselective Syntheses of DHPVs and Anti-Inflammatory Effect on IEC-6 Cells
Source: PubMed Central journal article supplement (PMC7248962; doi:10.3390/molecules25092215), 2020-05-08
Supplement: molecules-25-02215-s001.pdf [file molecules-25-02215-s001.pdf]

# Supporting Information

## Efficient and Divergent Enantioselective Syntheses of DHPVs and Anti-Inflammatory Effect on IEC-6 cells

Hyun Su Kim <sup>1,†</sup>, Sungkyun Chung <sup>1,†</sup>, Moon-Young Song <sup>1,†</sup>, Changjin Lim <sup>2</sup>, Hyeyoung Shin <sup>1</sup>, Joonseong Hur <sup>3</sup>, Hyuk Kwon <sup>1</sup>, Young-Ger Suh <sup>1</sup>, Eun-Hee Kim <sup>1,\*</sup>, Dongyun Shin <sup>4,\*</sup> and Seok-Ho Kim <sup>1,\*</sup>

<sup>1</sup> Department of Pharmacy, College of Pharmacy and Institute of Pharmaceutical Sciences, CHA University, 120 Haeryong-ro, Pocheon 11160, Gyeonggi-do, Korea; khs8812@snu.ac.kr (H. S. Kim), wjdtjdrbs123@naver.com (S. Chung), wso219@naver.com (M. Song), sed0guitar@naver.com (H. Kwon), ygsuh@cha.ac.kr (Y.-G. Suh)

<sup>2</sup> School of Pharmacy, Jeonbuk National University, Jeonju 54896, Republic of Korea; limcj@jbnu.ac.kr (C. Lim)

<sup>3</sup> Natural Products Research Institute, Korea Institute of Science and Technology (KIST), 679 Saimdang-ro, Gangneung 25451, Republic of Korea; hjs1120@kist.re.kr

<sup>4</sup> College of Pharmacy, Gachon University, 191 Hambangmoe-ro, Yeonsu-gu, Incheon 21936, South Korea. Gyeonggi-do, Korea

<sup>†</sup>These authors contributed equally to this work.

Correspondence to: S.-H. Kim ([ksh3410@cha.ac.kr](mailto:ksh3410@cha.ac.kr)), E.-H. K ([ehkim@cha.ac.kr](mailto:ehkim@cha.ac.kr)) and D. Y. Shin ([dyshin@gachon.ac.kr](mailto:dyshin@gachon.ac.kr))

## Table of Contents

|                                                                                      |    |
|--------------------------------------------------------------------------------------|----|
| Copies of <sup>1</sup> H NMR and <sup>13</sup> C NMR Spectra -----                   | S1 |
| Table 1. Comparison of <sup>1</sup> H-NMR data for Synthetic and reported DHPV ----- | S8 |
| Chiral HPLC analysis of Synthetic compounds -----                                    | S9 |

# $^1\text{H}$ and $^{13}\text{C}$ NMR Spectra

(*E*)-Methyl 5-(3,4-dimethoxyphenyl)pent-4-enoate (**6**)

$^1\text{H}$  NMR ( $\text{CDCl}_3$ , 500 MHz)

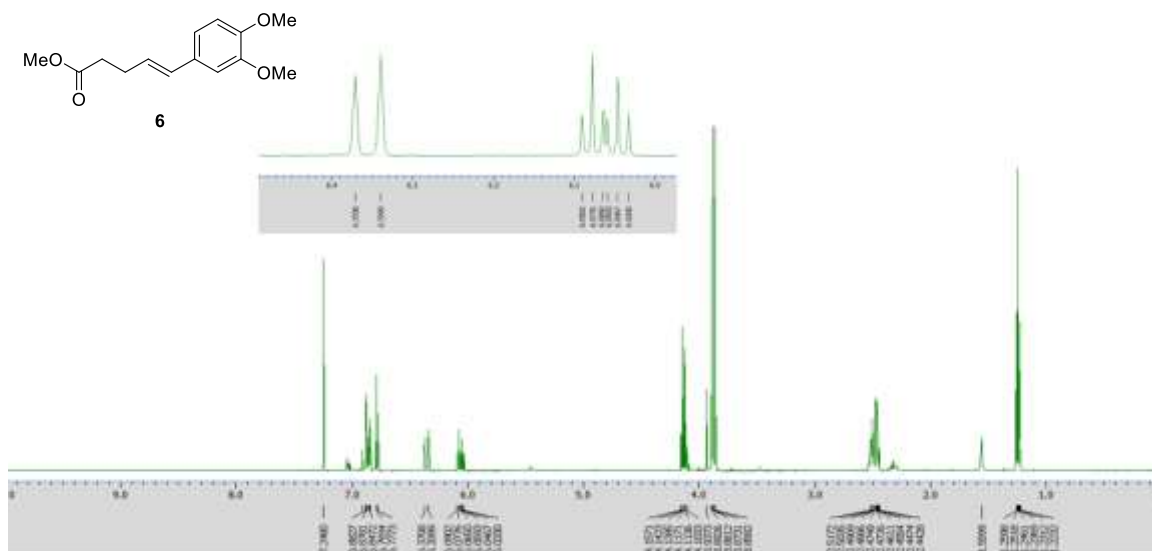

$^{13}\text{C}$  NMR ( $\text{CDCl}_3$ , 125 MHz)

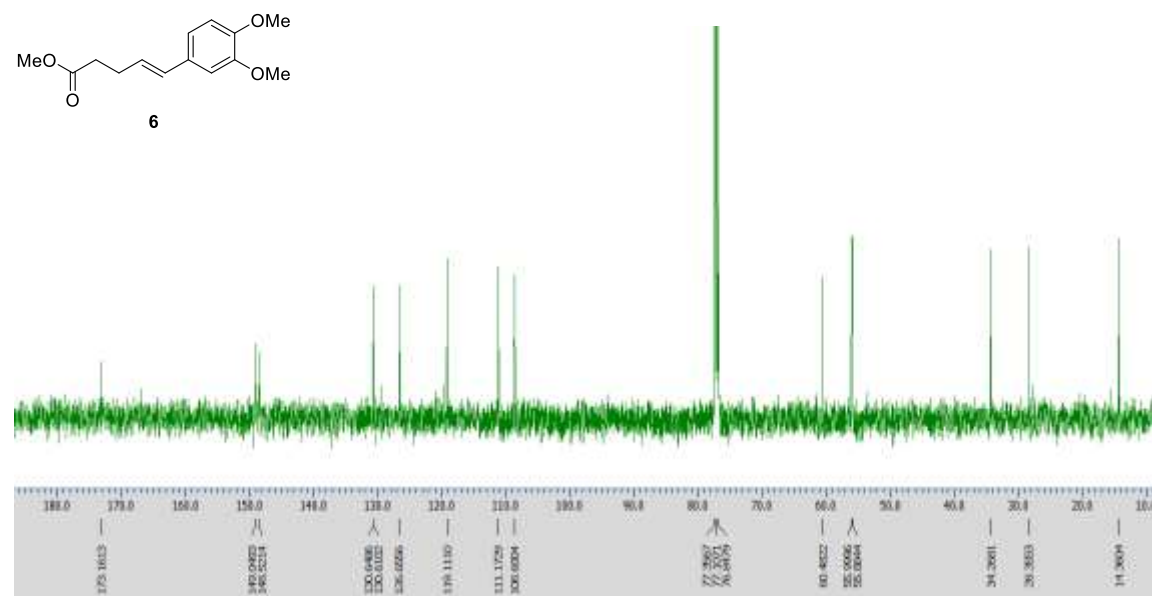

(S)-5-((S)-(3,4-dimethoxyphenyl)(hydroxy)methyl)dihydrofuran-2(3H)-one (**2a**)

<sup>1</sup>H NMR (CDCl<sub>3</sub>, 500 MHz)

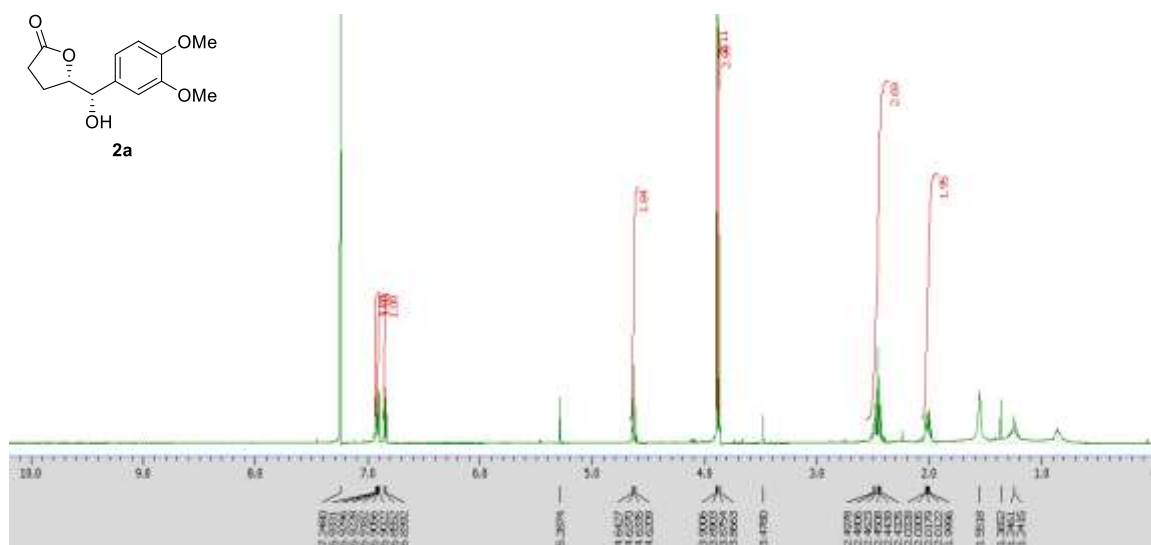

<sup>13</sup>C NMR (CDCl<sub>3</sub>, 125 MHz)

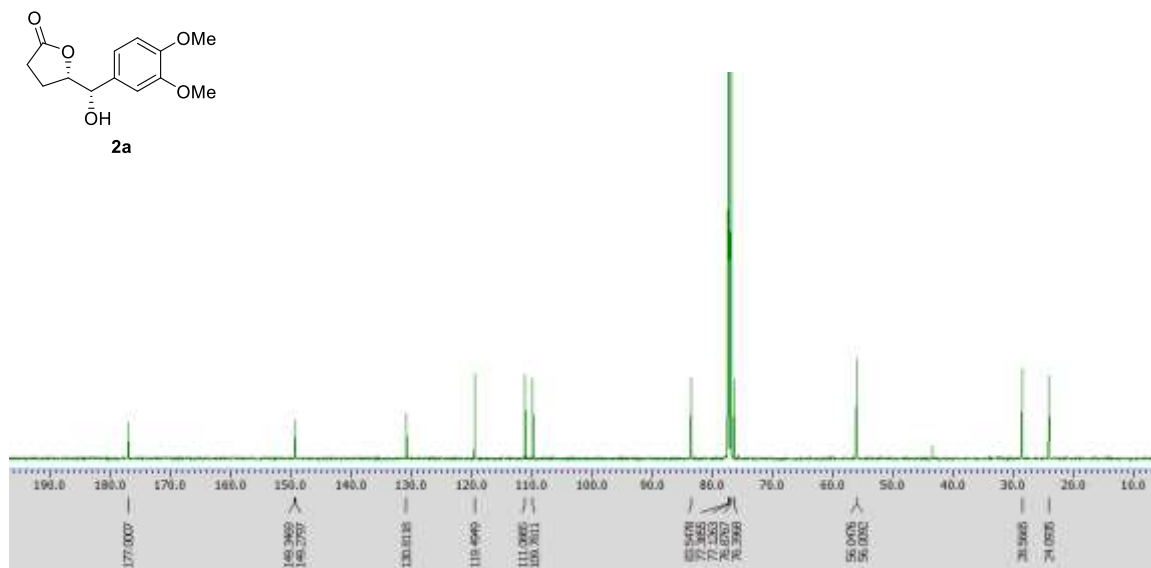





(R)-5-(3,4-dimethoxybenzyl)dihydrofuran-2(3H)-one (**7b**)

<sup>1</sup>H NMR (CDCl<sub>3</sub>, 500 MHz)

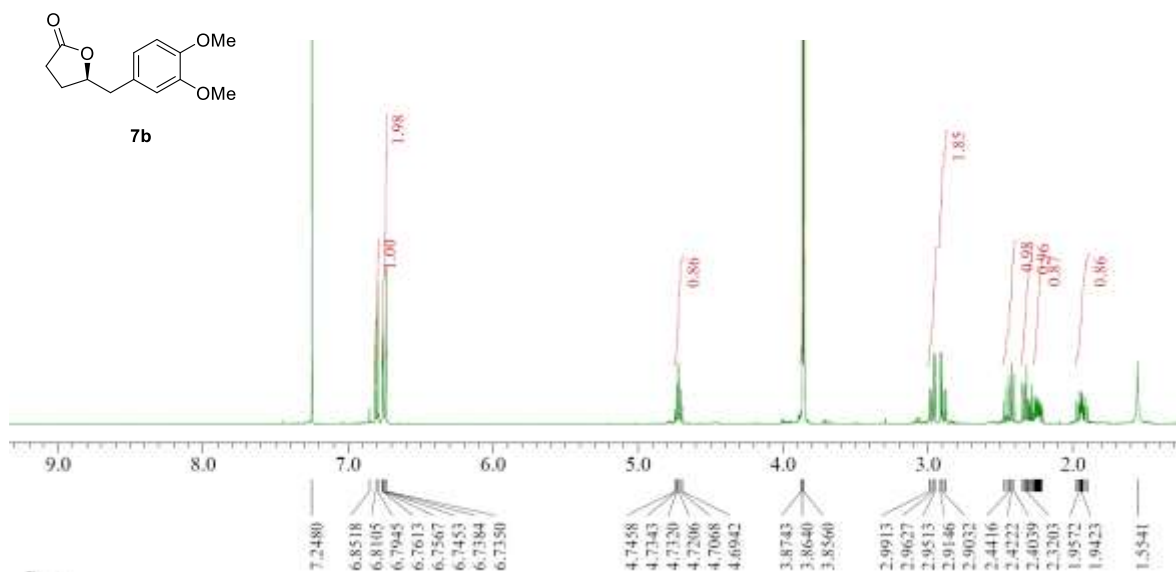

<sup>13</sup>C NMR (CDCl<sub>3</sub>, 125 MHz)

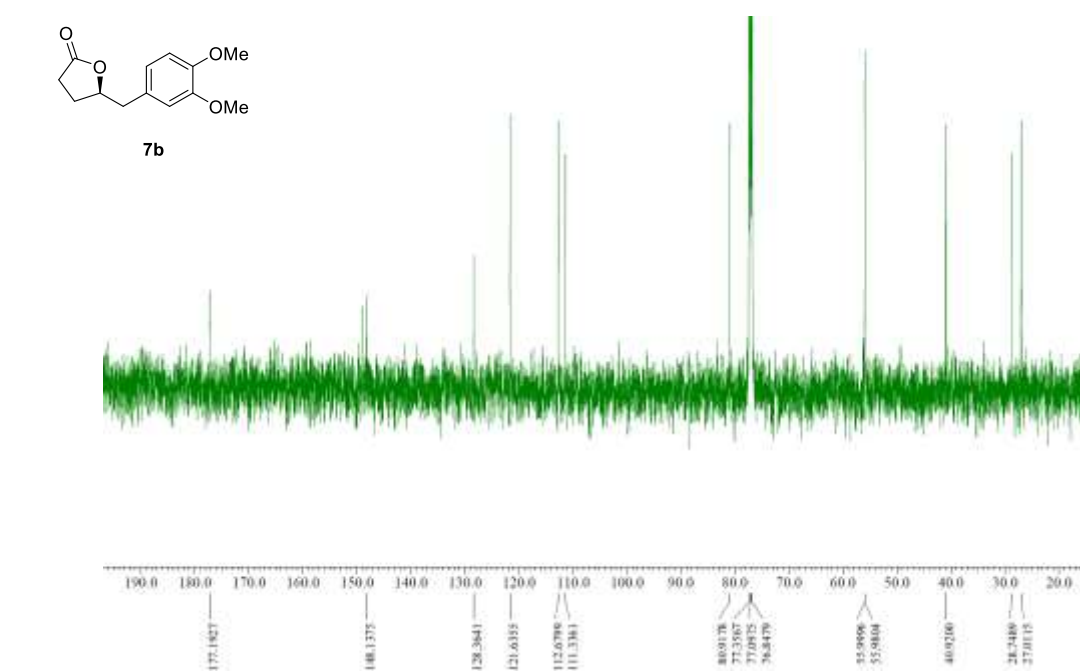

(S)-5-(3,4-dihydroxybenzyl)dihydrofuran-2(3H)-one (**1a**)

<sup>1</sup>H NMR (DMSO-*d*<sub>6</sub>, 500 MHz)

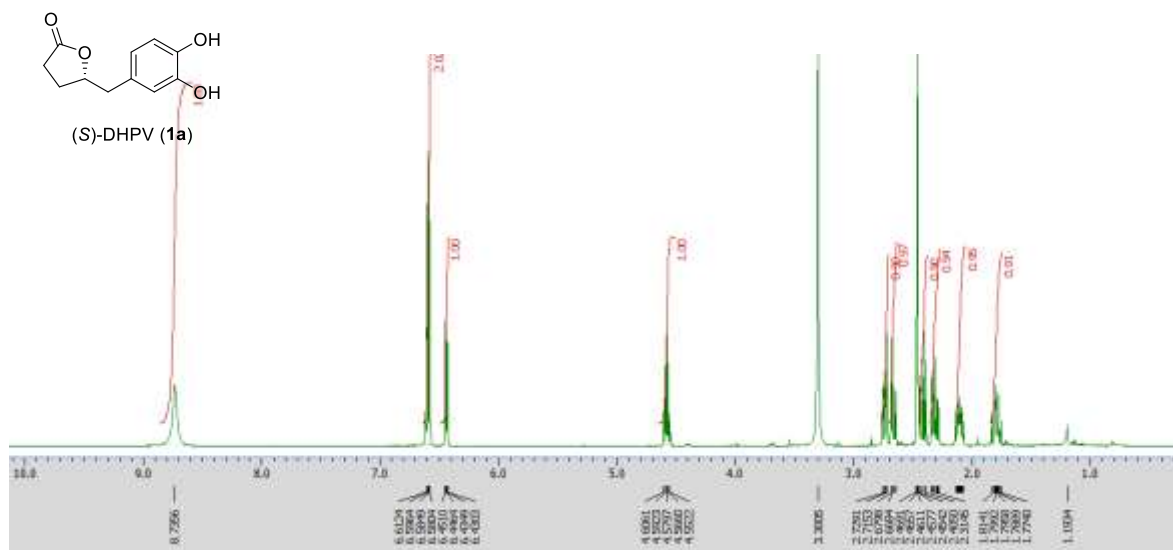

<sup>13</sup>C NMR (DMSO-*d*<sub>6</sub>, 125 MHz)

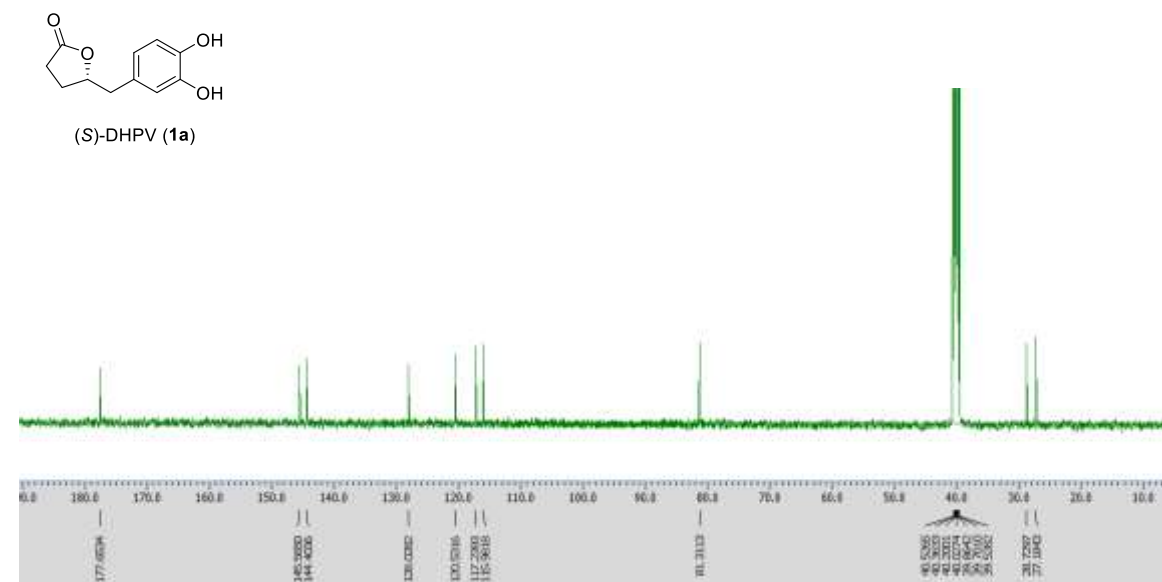

(R)-5-(3,4-dihydroxybenzyl)dihydrofuran-2(3H)-one (**1b**)

<sup>1</sup>H NMR (DMSO-*d*<sub>6</sub>, 500 MHz)

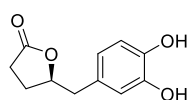

(R)-DHPV (**1b**)

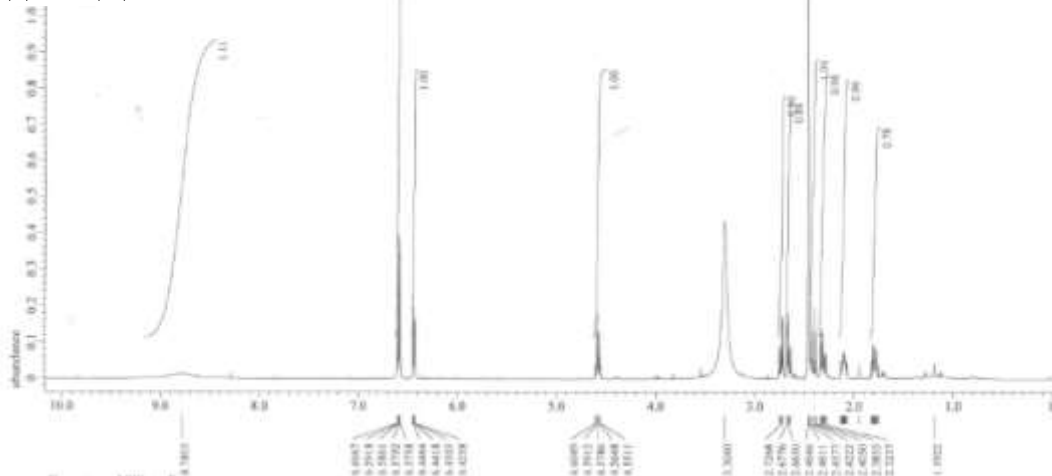

<sup>13</sup>C NMR (DMSO-*d*<sub>6</sub>, 125 MHz)

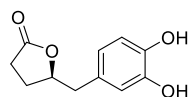

(R)-DHPV (**1b**)

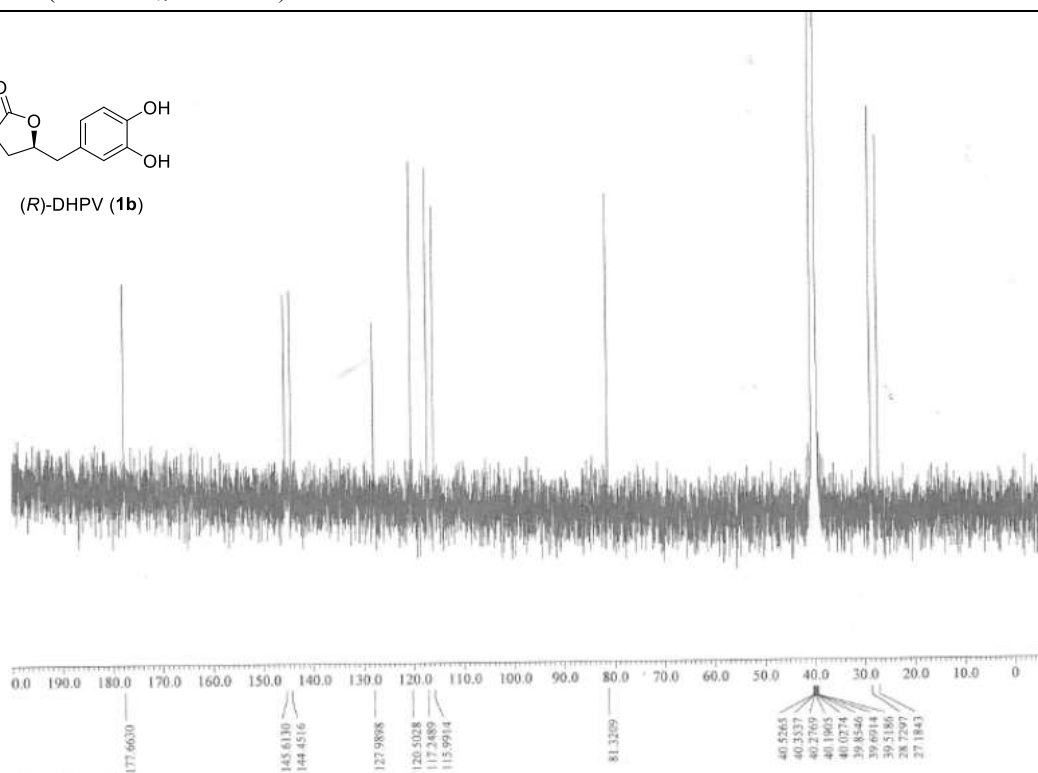



**Table 1. Comparison of <sup>1</sup>H-NMR data for Synthetic and reported DHPV.**

|                    | ( <i>R</i> )-DHPV | ( <i>S</i> )-DHPV | ( <i>R</i> )-DHPV                                   | ( <i>S</i> )-DHPV                                   |
|--------------------|-------------------|-------------------|-----------------------------------------------------|-----------------------------------------------------|
|                    | $\delta$          | $\delta$          | $\delta$ (mult, <i>J</i> )                          | $\delta$ (mult, <i>J</i> )                          |
| C2-CH <sub>2</sub> | 28.7              | 28.7              | 2.41 (dd, 17.8, 9.2),<br>2.31 (ddd, 17.2, 9.2, 4.6) | 2.41 (dd, 17.8, 8.6),<br>2.31 (ddd, 17.8, 9.8, 5.2) |
| C3-CH <sub>2</sub> | 27.1              | 27.1              | 2.13-2.08 (m),<br>1.83-1.75 (m)                     | 2.14-2.07 (m),<br>1.83-1.76 (m)                     |
| C4-CH              | 81.3              | 81.3              | 4.58 (quint, 6.7)                                   | 4.58 (quint, 6.7)                                   |
| C5-CH <sub>2</sub> | 40.2              | 40.2              | 2.73 (dd, 14.3, 6.8),<br>2.65 (dd, 14.3, 6.5)       | 2.73 (dd, 13.8, 6.9),<br>2.66 (dd, 13.7, 5.8)       |
| C1'                | 127.9             | 128.0             |                                                     |                                                     |
| C2'-H              | 115.9             | 115.9             | 6.57 (d, 1.7)                                       | 6.58 (d, 2.3)                                       |
| C3'-OH             | 145.6             | 145.5             | 8.78 (bs)                                           | 8.74 (bs)                                           |
| C4'-OH             | 144.4             | 144.4             | 8.78 (bs)                                           | 8.74 (bs)                                           |
| C5'-H              | 117.2             | 117.2             | 6.60 (d, 7.5),                                      | 6.60 (d, 8.0)                                       |
| C6'-H              | 120.5             | 120.5             | 6.44 (dd, 8.0, 2.3)                                 | 6.44 (dd, 8.0, 2.3)                                 |

## Chiral HPLC analysis of Synthetic compounds

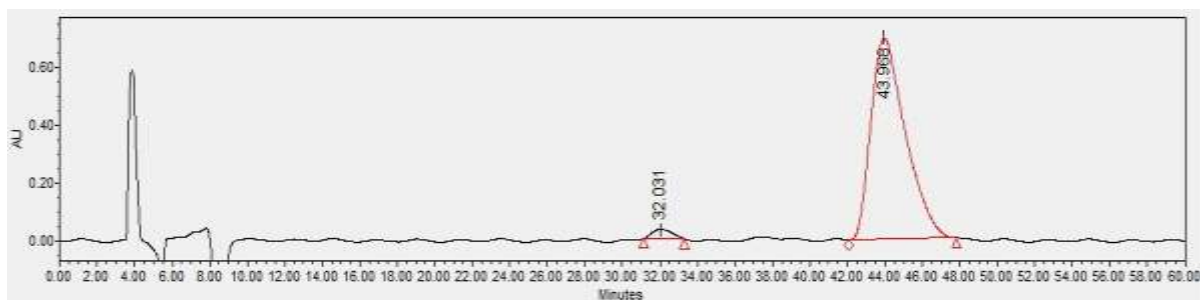

(S)-DHPV (**1a**)

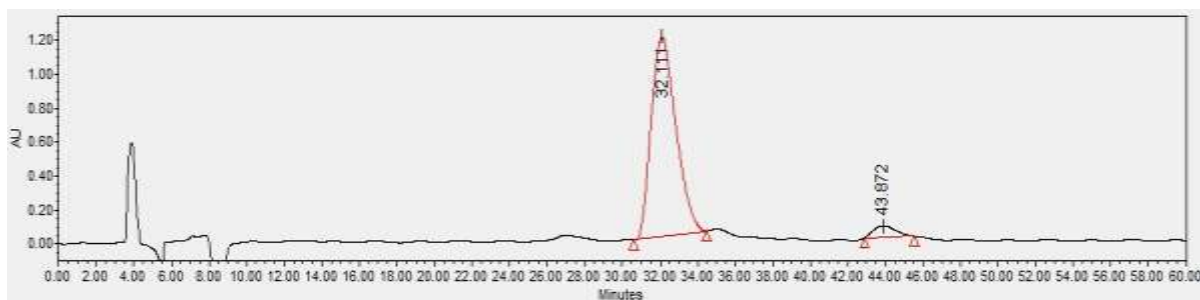

(R)-DHPV (**1b**)

Chiral HPLC chromatograms were obtained under the following conditions; Column, DAICEL CHIRALPAK® AD-H, 4.6 x 250 mm, 5  $\mu$ m; detection, UV 210 nm; flow rate 0.8 mL/min; Mobile phase, A: Isopropyl alcohol, B: *n*-Hexane; Isocratic, A:B = 10:70

**Figure S1.** Chiral HPLC analysis of (S)-DHPV (**1a**) and (R)-DHPV (**1b**).
